# Supplementary material for: DNA Methylome Changes of Muscle- and Neuronal-Related Processes Precede Bladder Cancer Invasiveness
Source: MDPI journal article supplement (doi:10.3390/cancers14030487), 2022-01-19
Supplement: s1 [file s1]

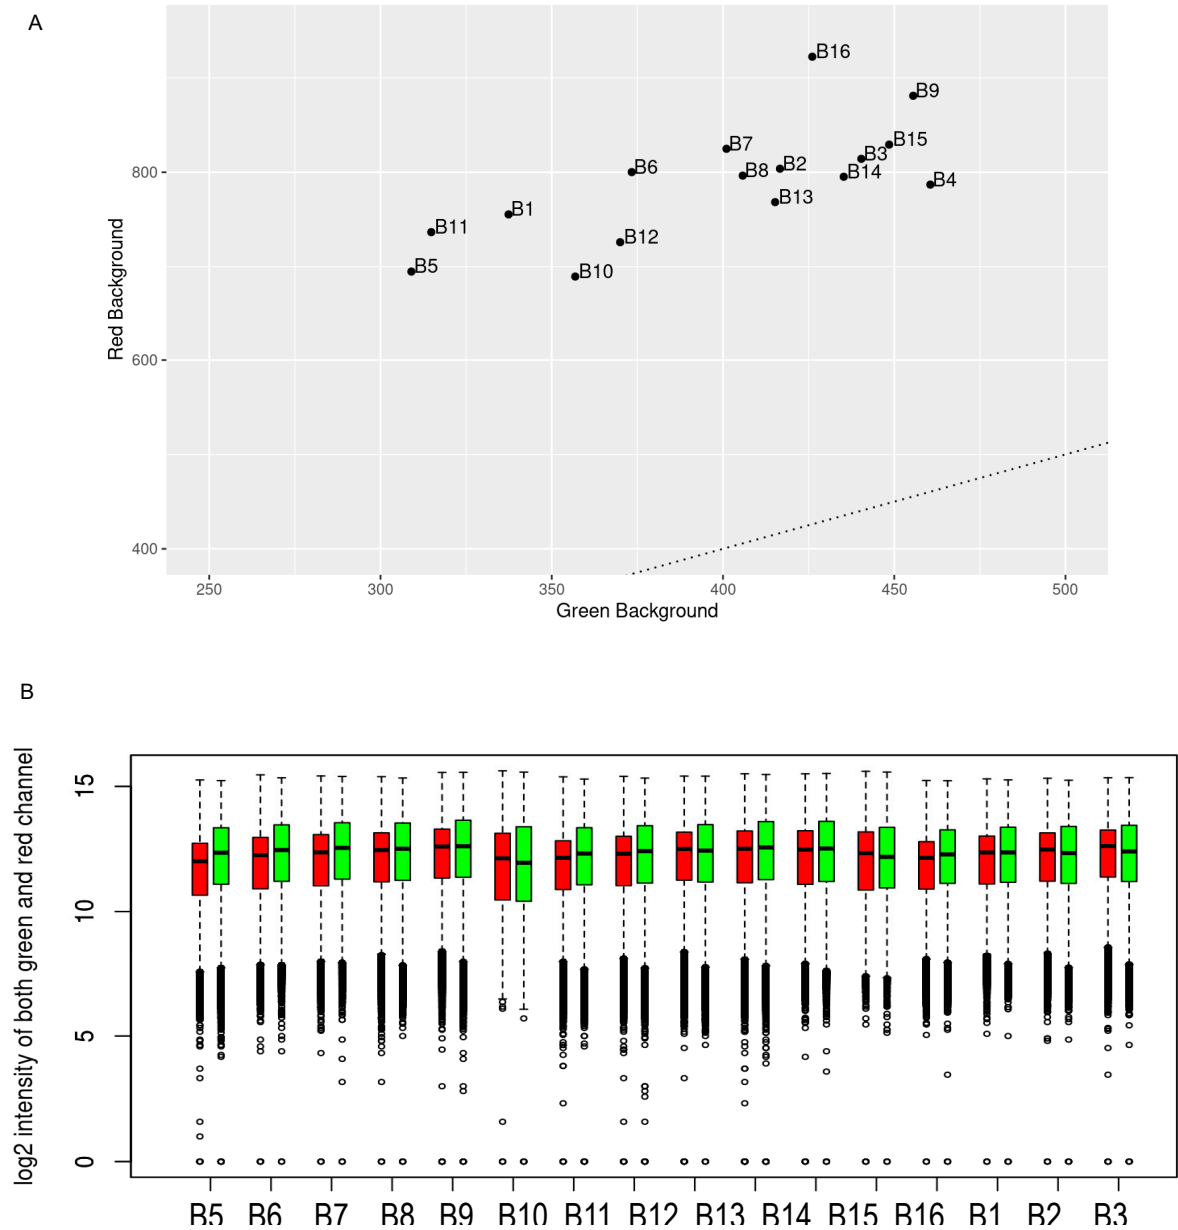

**Supplementary Figure S1.** Quality control of Infinium Mouse Methylation BeadChip data. **(A)** QC plot of  $\log_2$  median intensities in red and green detection channels. The cut-off for acceptable sample quality is denoted by the dashed diagonal line and demarcates the points where the average of red and green channel  $\log_2$  median intensities is 10.5. **(B)** Boxplots showing the spread of  $\log_2$  intensities in both red and green across analyzed samples.

**Supplementary Table S1.** Primer sequences and PCR conditions used for pyrosequencing.

| Gene locus           | Forward Primer (5'-3')     | Reverse Primer (5'-3') <sup>1</sup> | Sequencing Primer (5'-3')                                                                                       | PCR conditions <sup>2</sup> |    |
|----------------------|----------------------------|-------------------------------------|-----------------------------------------------------------------------------------------------------------------|-----------------------------|----|
|                      |                            |                                     |                                                                                                                 | A                           | X  |
| <b>Dmpk</b>          | TGGAGATGTTGTAGGTTTTAGG     | b-CAACTTTCTTCTAAAACCCCA             | TGTTGTAGGTTTTAGGAGT<br>TATTTATAGTTTTTTTTT                                                                       | 60°C                        | 50 |
| <b>Itih5</b>         | GGAGATGATTTAGTTTGGTAGG     | b-TACTCCTAACCCACAATAATC             | TTTAGTTTGGTAGGAGTGTT<br>ATATTGTTAGGGATATTT                                                                      | 60°C                        | 50 |
| <b>Mmp12</b>         | TGGTGGGATTAAGTGAGTGTTGAA   | b-TCATCACTCATCTCTATACCTCTC          | AGTATGAAAGATGAGGAA<br>GGTGGAAAGTTAAGATTTAT                                                                      | 59°C                        | 55 |
| <b>Mylk,<br/>Rik</b> | TGYGGGAGTTGTAGTTTTGA       | b-TATCCCTCACTTAAACCAACTT            | TTTTTTATTTTTTATTGT<br>GGAGTAATATGTTAAATGT<br>GTTTTTAAGTATTTGAAA                                                 | 58°C                        | 55 |
| <b>Mylk</b>          | GGTGAAGAAGGTTTTTTTTTGAATTG | b-CACCCCTCCACCCTTTCA                | TTTAGAATATTTTTTGGTA<br>AGAGTTGTAGAGGGGAATT<br>AGTAGTAGATAGAAATTGT<br>TAGAGTTGTGAGATAATG<br>GTTTTATTTTGGAGAATTTT | 59°C                        | 50 |
| <b>Pitx2</b>         | GAAGAGAGAGGGATGAGAG        | b-ACTACCAACCATACTAATTC              | GTAGAGTAAATATTATATTT                                                                                            | 58°C                        | 50 |
| <b>Prelp</b>         | ATGAATTGGGGTTGGGTAAAGT     | b-ATCTAATTTCTTCCCCATTCCC            | GTATTTTTTGTGTGTTAGT<br>TTTTTAGTGAATTTAGGG                                                                       | 60°C                        | 50 |
| <b>Serpinb2</b>      | TGTGTGGGAGGGGTAGA          | b-CTTACCCTCTACACAACCTCA             |                                                                                                                 | 56°C                        | 50 |

<sup>1</sup>b represents biotin

<sup>2</sup>PCR conditions: 94°C for 15 min (1 cycle), 94°C for 30 s, A°C for 30 s, 72°C for 30 s (X cycles), 72°C for 5 min (1 cycle)

**Supplementary Table S2.** List of primers used for qPCR analysis.

| <b>Gene target</b> | <b>Primer (5'-3')</b>  |
|--------------------|------------------------|
| Dmpk_F             | CCCCTTTACACCAGACTTCG   |
| Dmpk_R             | ATGTCTTCCTGCATGTCTGAC  |
| Itih5_F            | TGCTTTAACATCGACGGAGAG  |
| Itih5_R            | GGTGATGGTGCGGAAGTAG    |
| Mmp12_F            | CTTAACCCCAGCACATTTTCG  |
| Mmp12_R            | GTGACAGCATCAAACTCAAGC  |
| Mylk_F             | TTGTGGCTCCTGAAGTGATC   |
| Mylk_R             | TGAAGTGACGTTGGCTAAGG   |
| Pitx2_F            | CAGAGGACTCATTTCACTAGCC |
| Pitx2_R            | CGGCGATTCTTGAACCAAAC   |
| Prelp_F            | GGGAGGAACAGAAGAGTGC    |
| Prelp_R            | GTTTTGGTCTTGTCGGTTGG   |
| Serpib2_F          | CCCGAAGGTTCTGTAGATGAAG |
| Serpib2_R          | CTGGACAGGTATGCTCTCATG  |
| Actb_F             | CACTGTCGAGTCGCGTCC     |
| Actb_R             | TCATCCATGGCGAACTGGTG   |

\* F indicate forward primer and R reverse.

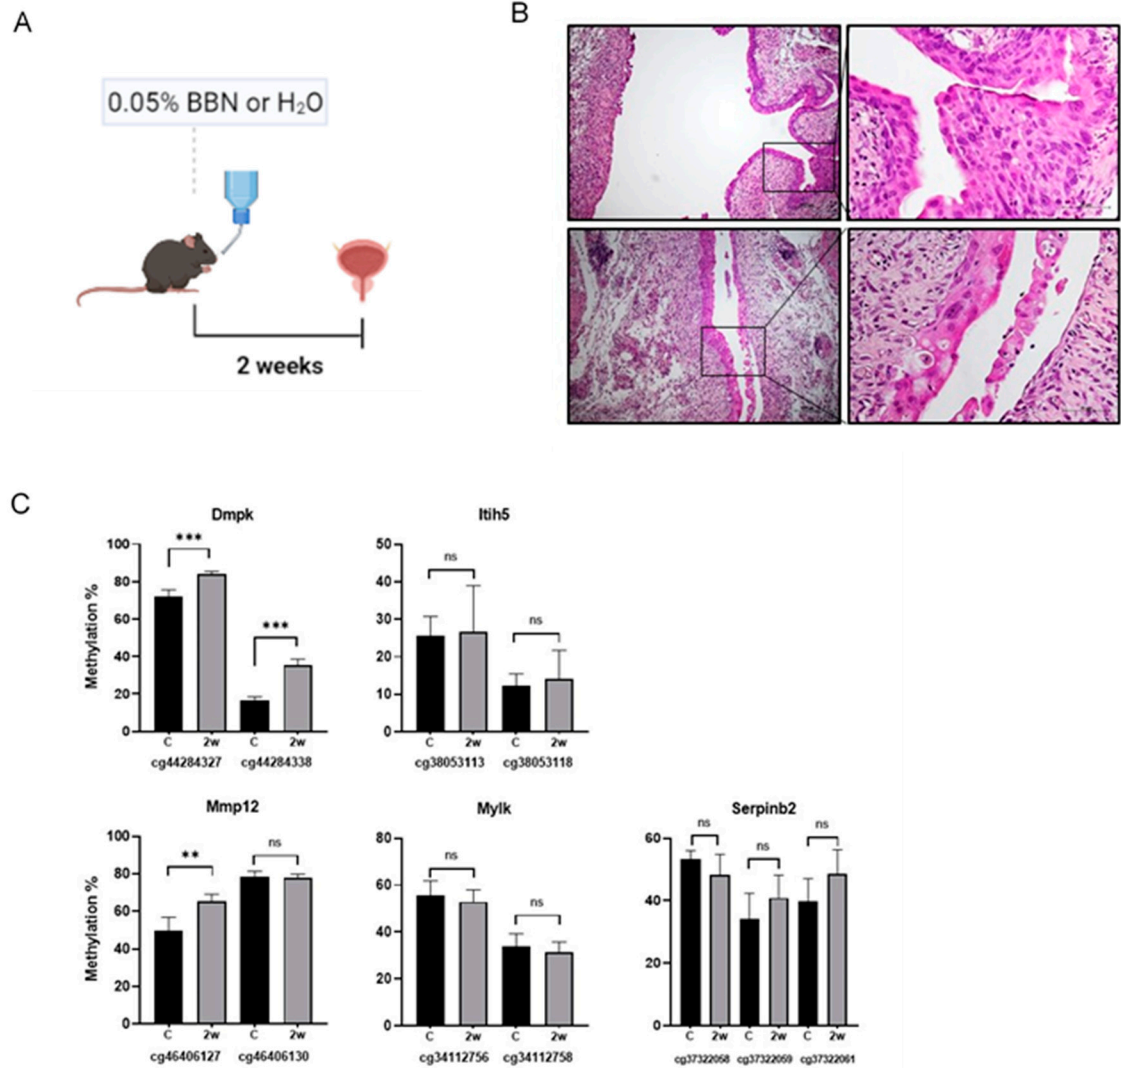

**Supplementary Figure S2.** Short treatment of BBN exposure. (A) A schematic representation of short BBN treatment and paired controls (Created with BioRender.com). (B) Histopathological analysis of bladder tissue after 2 weeks of BBN exposure characterized by reactive atypia and influx of inflammatory cells. (C) DNA methylation levels of the CpG sites (indicated below x axis) showing mean methylation in validation samples. Number of mice in the control group was 8 and in 2 weeks BBN-treated was 4. Statistical analysis was performed using Unpaired T-test. \* $p < 0.05$ ; \*\* $p < 0.01$ ; \*\*\* $p < 0.001$ ; \*\*\*\* $p < 0.0001$ ; ns, not significant. C, control; 2w, 2 weeks of BBN-exposure.

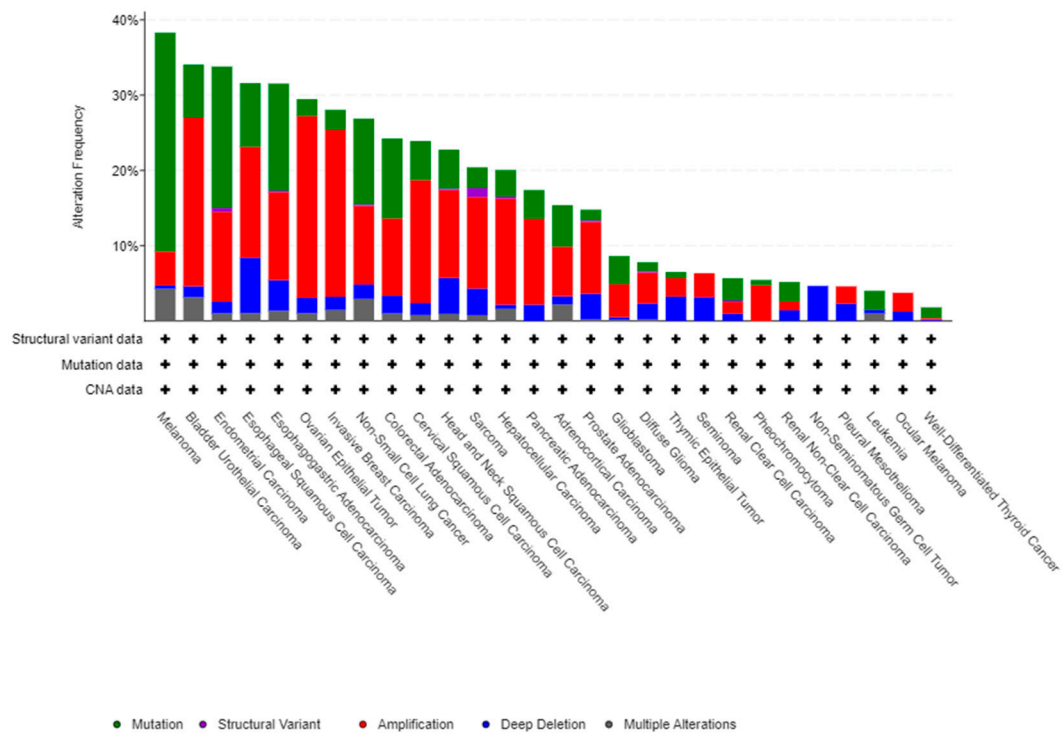

**Supplementary Figure S3.** Mutational status of validated genes across different cancer types. Somatic mutation and alteration frequencies analysis of *DMPK*, *ITIH5*, *MMP12*, *MYLK*, *PRELP*, *PITX2* and *SERPINB2* in cBioPortal database (TCGA PanCancer Atlas Studies).

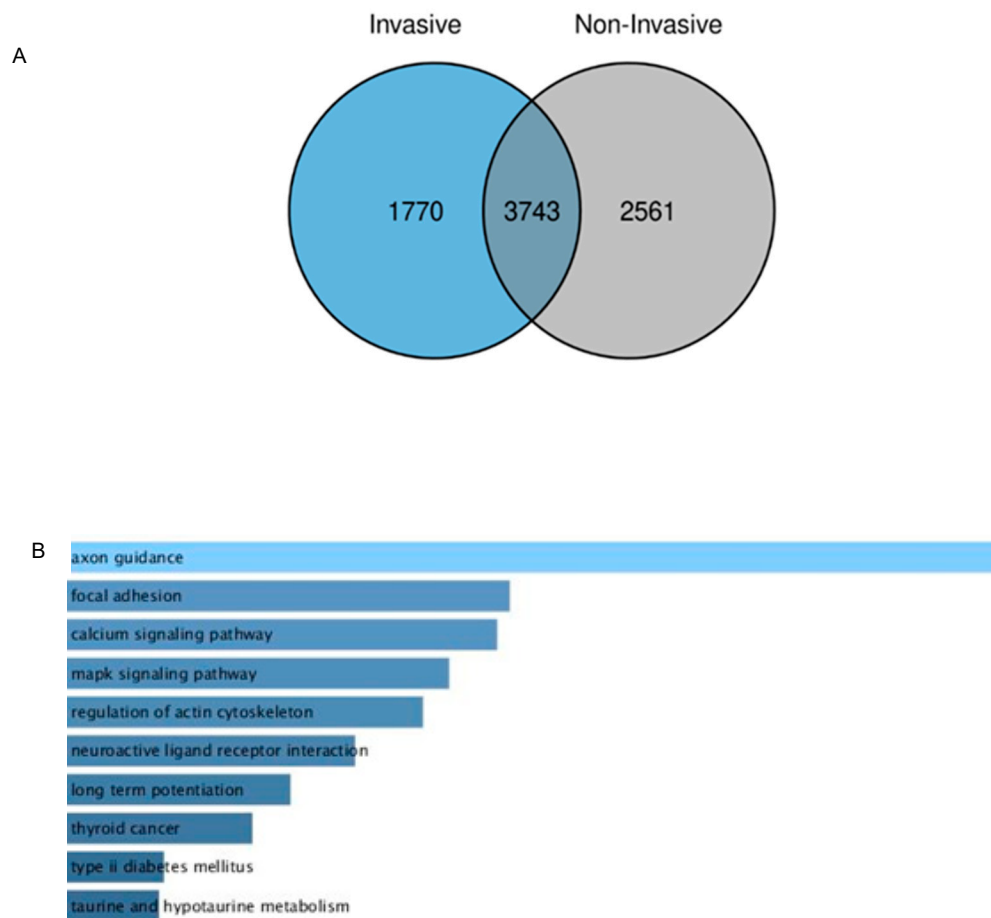

**Supplementary Figure S4.** The overlap between invasive and non-invasive groups. (A) Venn diagram showing the overlap of the numbers of differentially methylated regions (DMRs) detected between invasive and non-invasive groups compared to controls; (B) KEGG pathway performed on 3743 DMRs from the overlapped region. All pathways in blue show  $p < 0.05$ .
